# Supplementary material for: Effects of aluminum substitution in nickel-rich layered LiNixAl1−xO2 (x = 0.92, 0.95) positive electrode materials for Li-ion batteries on high-rate cycle performance
Source: Royal Society of Chemistry journal article supplement (doi:10.1039/d1ta04312a), 2021-01-01
Supplement: d1ta04312a1.pdf [file d1ta04312a1.pdf]

## Supporting Information

### Effects of Aluminum Substitution in Nickel-rich Layered $\text{LiNi}_x\text{Al}_{1-x}\text{O}_2$ ( $x=0.92, 0.95$ ) Positive Electrode Materials for Li-Ion Batteries on High-Rate Cycle Performance

Received 00th January 20xx,  
Accepted 00th January 20xx

DOI: 10.1039/x0xx00000x

Haruki Kaneda,<sup>\*ab</sup> Yuki Furuichi,<sup>a</sup> Atsunori Ikezawa<sup>b</sup> and Hajime Arai<sup>\*b</sup>

*a. Sumitomo Metal Mining Co., Ltd, Battery Research Laboratories*

*17-3 Isoura-cho, Niihama, Ehime 792-0002, Japan. E-mail: haruki.kaneda.d3@smm-g.com*

*b. School of Materials Science and Technology, Tokyo Institute of Technology*

*4259 Nagatusta-cho, Midori-ku, Yokohama Kanagawa 226-8502, Japan. E-mail: arai.h.af@m.titech.ac.jp*

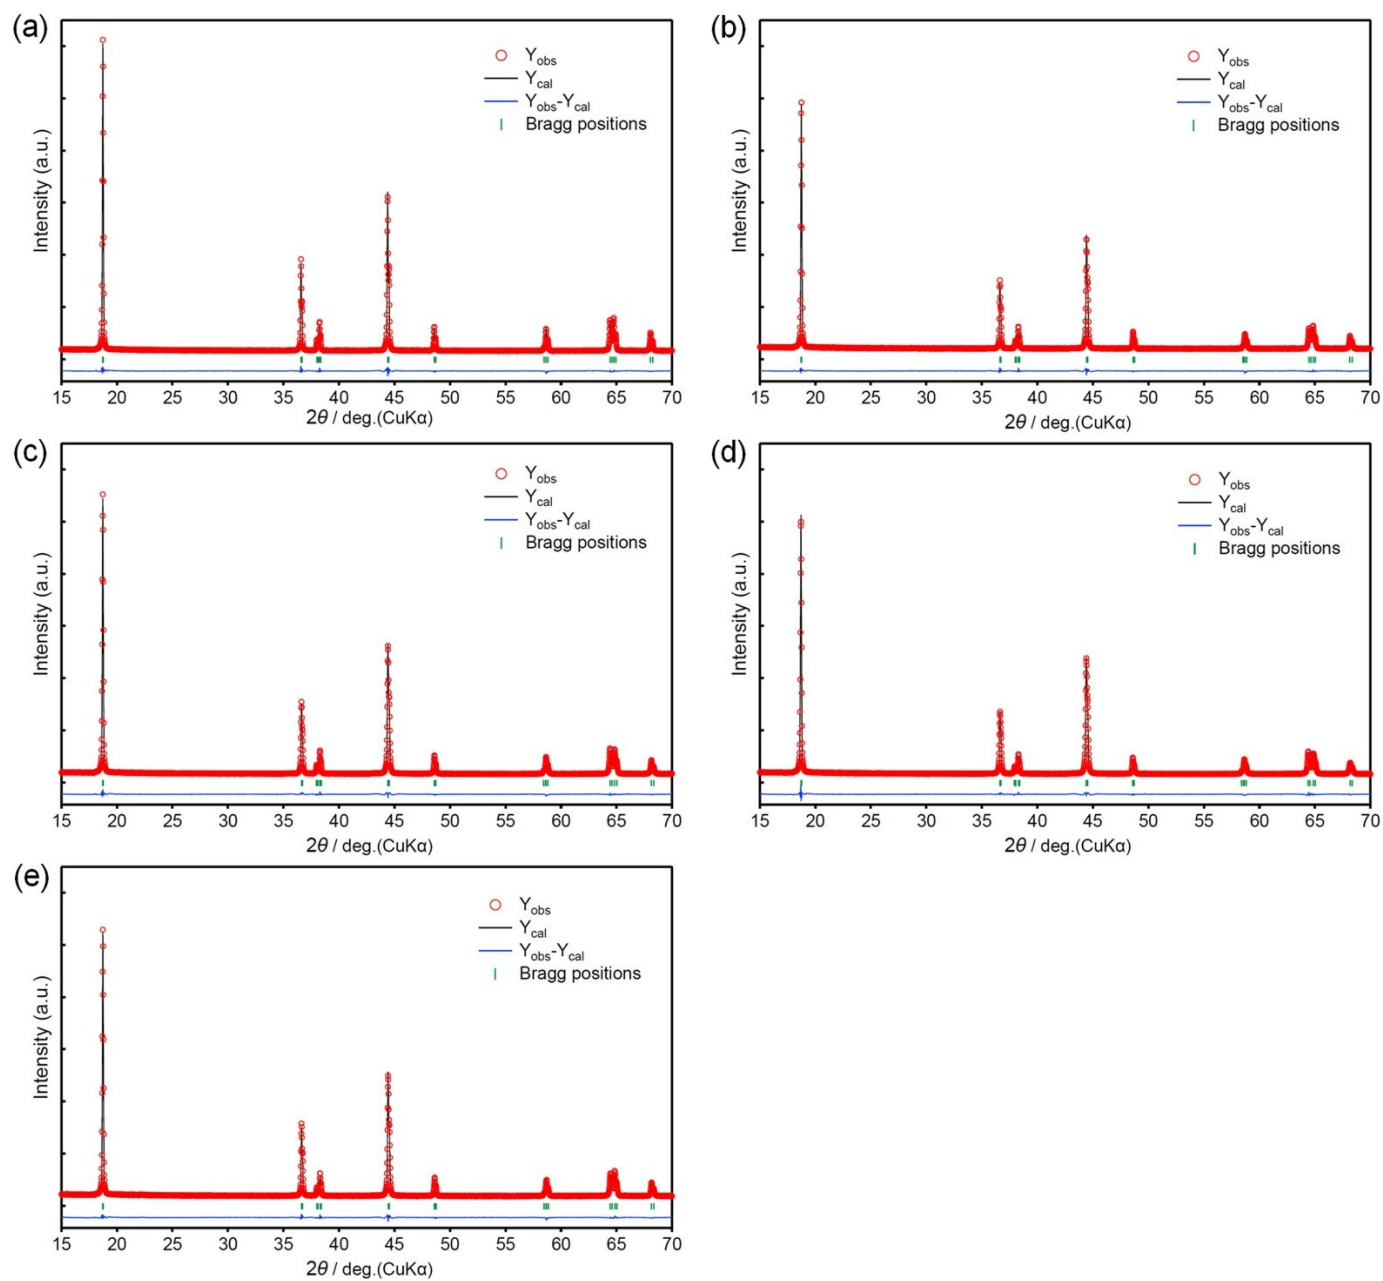

**Figure S1** XRD patterns of (a) LNO, (b) NC95, (c) NA95, (d) NA92, (e) NCA95.

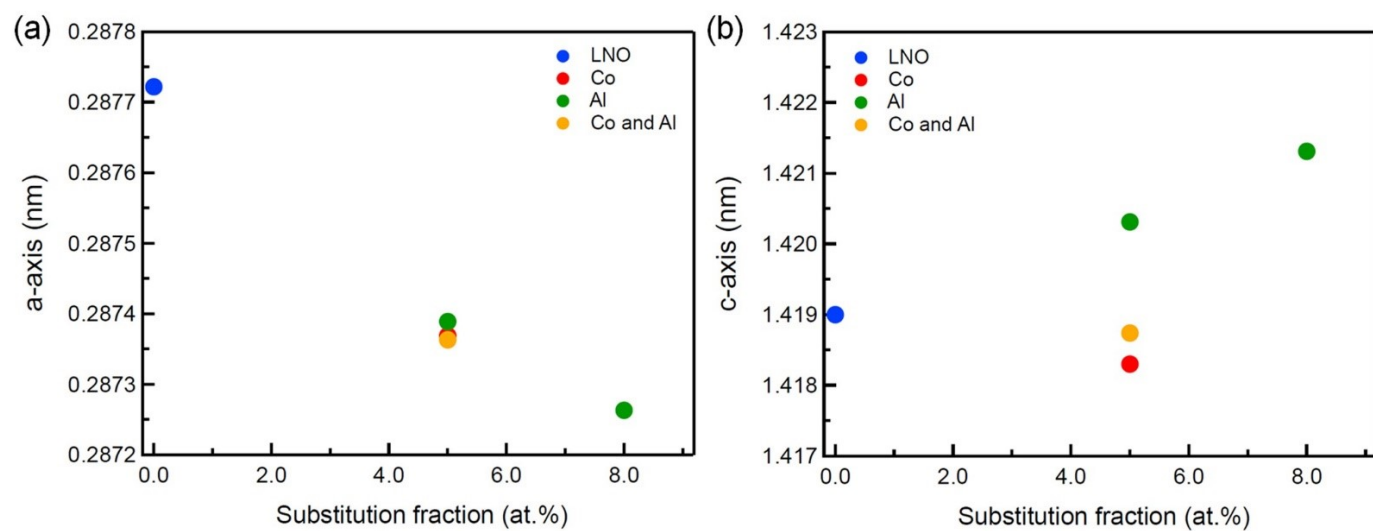

**Figure S2** Lattice constant (a) a-axis, (b) c-axis of the prepared samples.

**Table S1** Charge-discharge capacity, irreversible capacity loss, and coulombic efficiency of the samples measured in half-cell. The test was conducted in a voltage window of 2.5-4.3 V (cc) at 0.05 C, all at 25°C

| Sample | Charge capacity<br>[mAh g <sup>-1</sup> ] | Discharge<br>capacity<br>[mAh g <sup>-1</sup> ] | Irreversible<br>capacity loss<br>[mAh g <sup>-1</sup> ] | Coulombic<br>efficiency [%] |
|--------|-------------------------------------------|-------------------------------------------------|---------------------------------------------------------|-----------------------------|
| LNO    | 257                                       | 232                                             | 25                                                      | 90.3                        |
| NC95   | 252                                       | 238                                             | 14                                                      | 94.4                        |
| NA95   | 251                                       | 226                                             | 25                                                      | 90.0                        |
| NA92   | 241                                       | 214                                             | 27                                                      | 88.8                        |
| NCA95  | 250                                       | 233                                             | 17                                                      | 93.2                        |

**Table S2** Discharge capacity of the samples at 0.2 C and 2 C after each cycle

| Sample | Discharge capacity after 1 <sup>st</sup> cycle |     |                                        | Discharge capacity after 300 cycles |     |                                        | Discharge capacity after 500 cycles |     |                                        |
|--------|------------------------------------------------|-----|----------------------------------------|-------------------------------------|-----|----------------------------------------|-------------------------------------|-----|----------------------------------------|
|        | [mAh g <sup>-1</sup> ]                         |     | 2 C/<br>0.2 C<br>capacity<br>ratio [%] | [mAh g <sup>-1</sup> ]              |     | 2 C/<br>0.2 C<br>capacity<br>ratio [%] | [mAh g <sup>-1</sup> ]              |     | 2 C/<br>0.2 C<br>capacity<br>ratio [%] |
|        | 0.2 C                                          | 2 C |                                        | 0.2 C                               | 2 C |                                        | 0.2 C                               | 2 C |                                        |
|        |                                                |     |                                        |                                     |     |                                        |                                     |     |                                        |
| LNO    | 220                                            | 184 | 83.3                                   | 166                                 | 106 | 63.8                                   | 150                                 | 80  | 53.3                                   |
| NC95   | 222                                            | 208 | 93.6                                   | 185                                 | 137 | 73.9                                   | 168                                 | 112 | 66.8                                   |
| NA95   | 217                                            | 197 | 90.6                                   | 177                                 | 136 | 76.9                                   | 159                                 | 111 | 70.0                                   |
| NA92   | 208                                            | 188 | 90.5                                   | 190                                 | 162 | 85.5                                   | 174                                 | 141 | 81.0                                   |
| NCA95  | 222                                            | 206 | 92.5                                   | 189                                 | 143 | 75.6                                   | 173                                 | 118 | 68.4                                   |

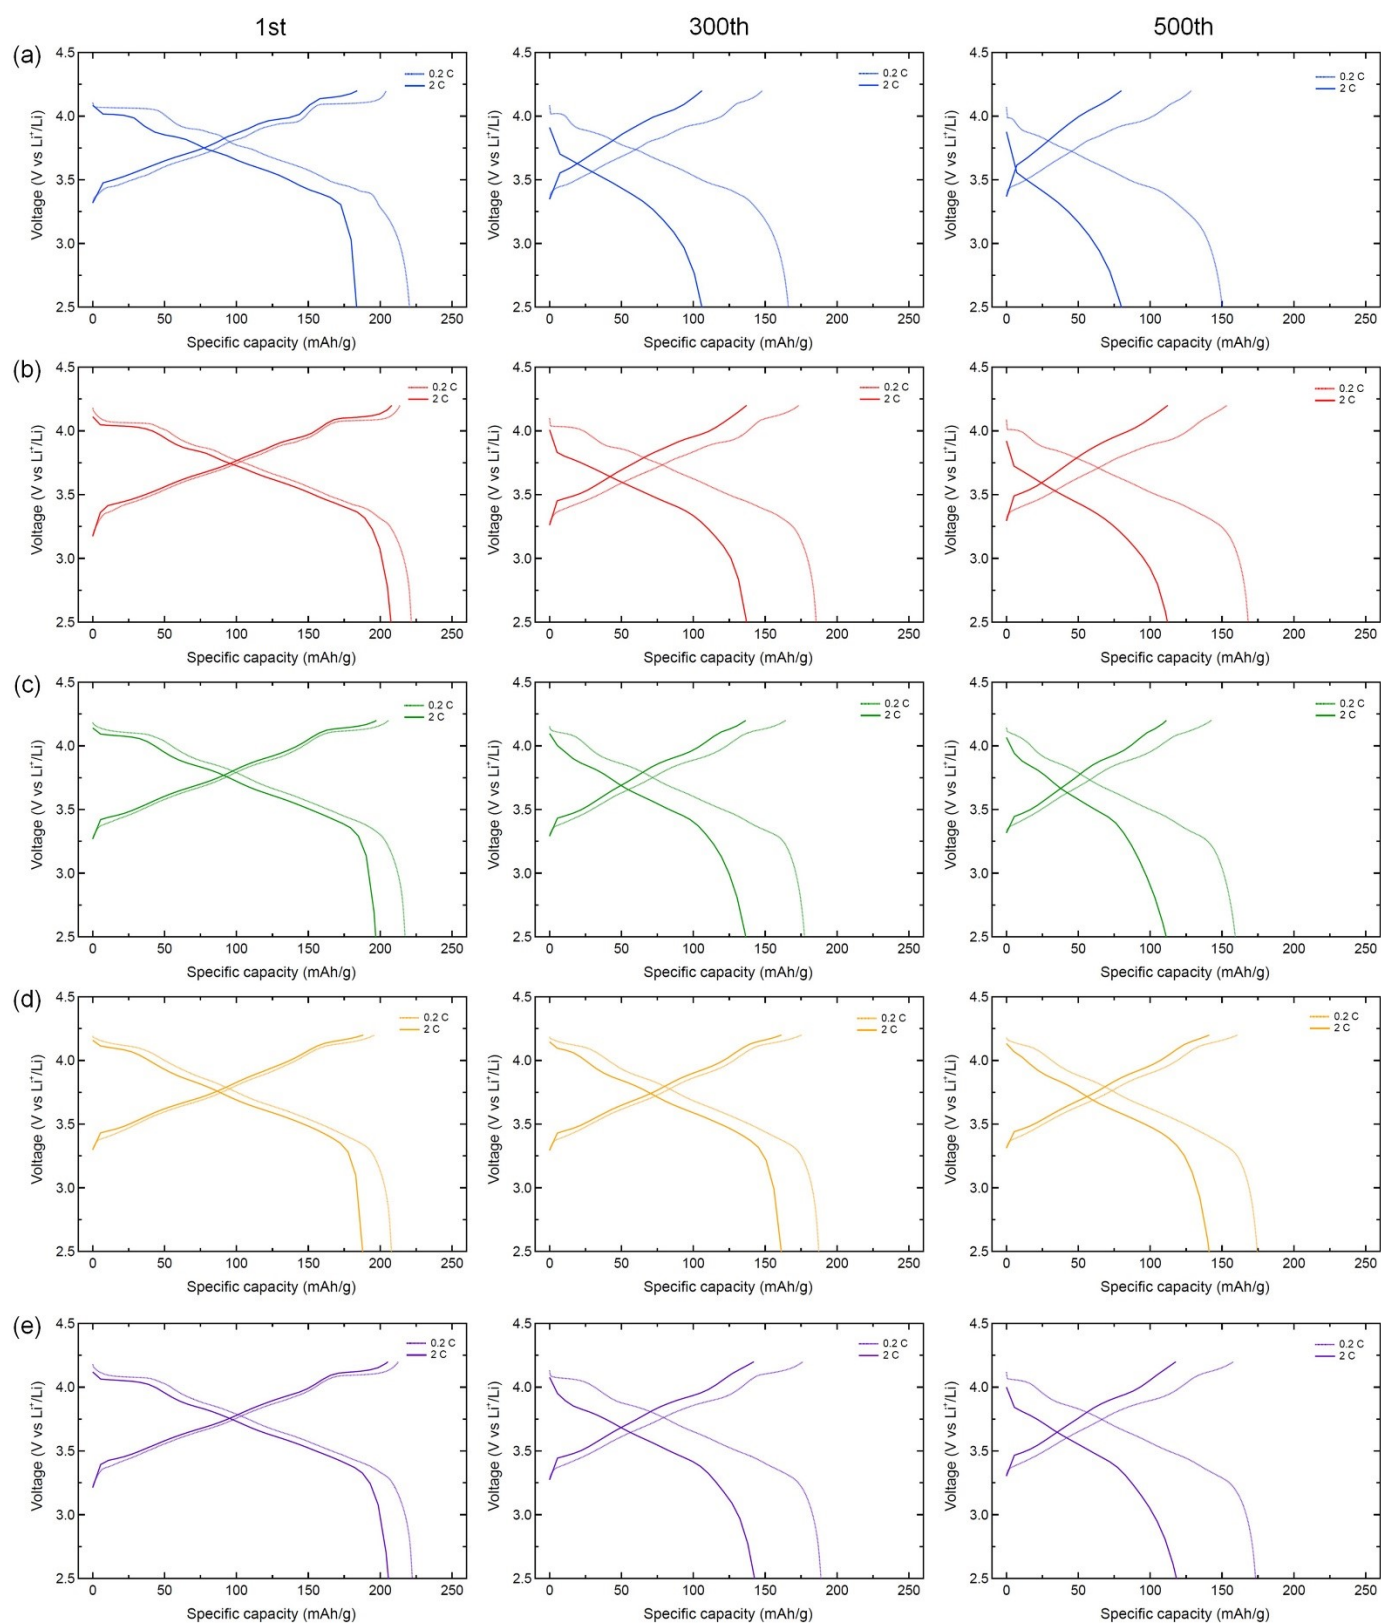

**Figure S3** The charge-discharge curve of (a) LNO, (b) NC95, (c) NA95, (d) NA92, (e) NCA95 at 0.2 C (thin) and 2 C (bold) after each cycle.

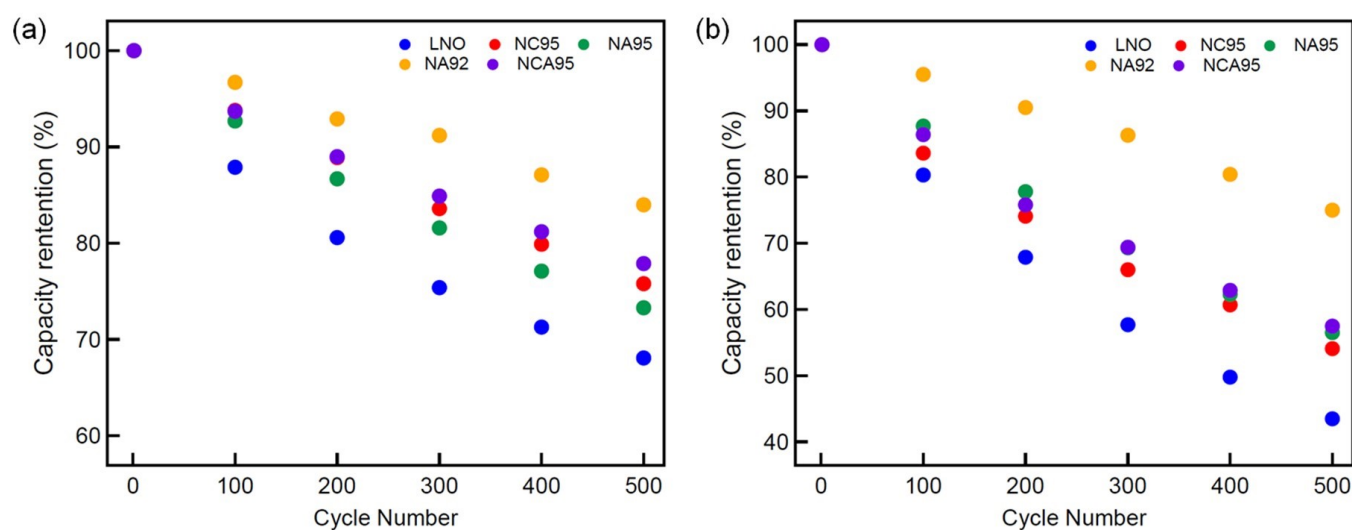

**Figure S4** Changes of capacity retention at (a) 0.2 C and (b) 2 C in the samples.

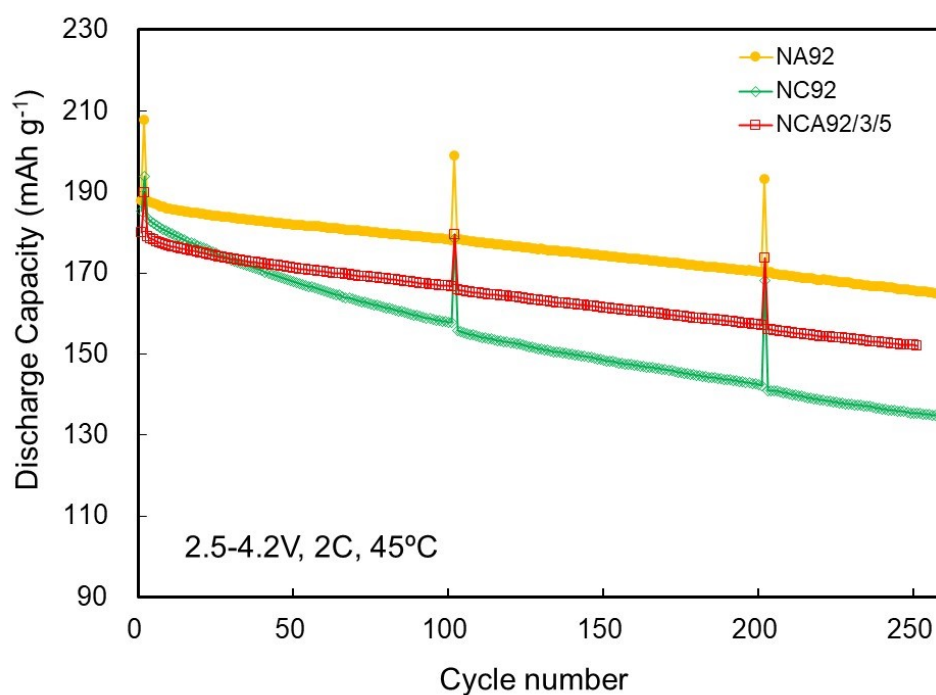

**Figure S5** Electrochemical cycling performance of NA92, NC92 and NCA92/3/5 measured in full-cell. The cells were cycled in a voltage window of 2.5-4.2 V at 2 C, all at 45°C. Every 100 cycles were discharged at a 0.2 C rate.

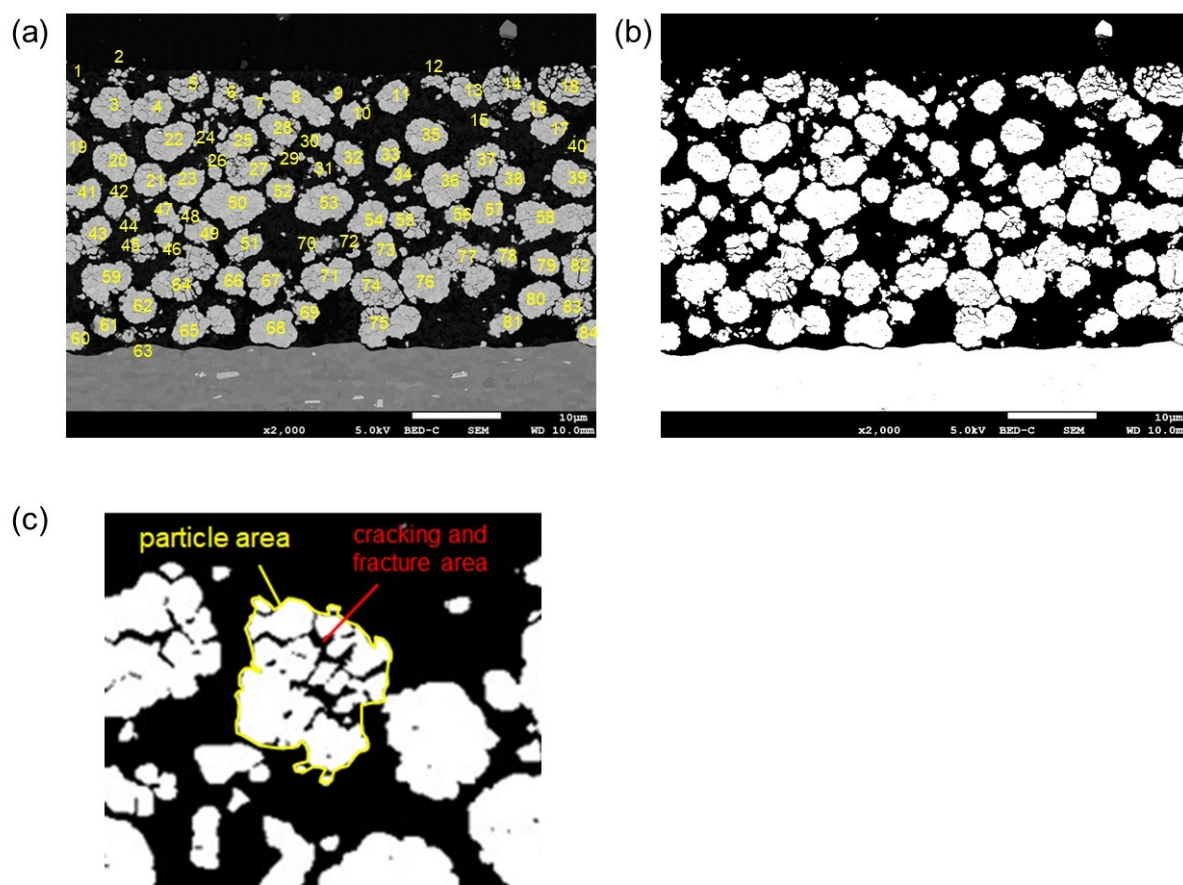

**Figure S6** The procedure of quantification for the cracking particles. (a) Numbering of polycrystalline particles (more than 70-80 particles), (b) The image after binarization, (c) The analysis area.

From the cross-sectional SEM image (2k) after the cycle, cracked polycrystalline particles are extracted and numbered like yellow numbers in Fig. S6 (a) (LNO after 500 cycles). Next, ImageJ<sup>[1, 2]</sup>, an image analysis software, is used to perform binarization. The binarization process is performed automatically (Image → adjust → default → auto). The result of binarization shows in Fig. S6 (b). After the binarization process, the particle area and the cracking and fracture area in the particle were determined for all the numbered particles. As shown Fig. S6 (c), the particle area was defined as the area inside the periphery of the particle (white area surrounded by yellow line), and black area was considered as the area of cracking



and fracture. The degree of particle cracking was obtained by dividing the cracking and fracture area by the particle area.

#### References

[1] W. S. Rasband, ImageJ, U. S. National Institutes of Health, Bethesda, Maryland, USA, <https://imagej.nih.gov/ij/>, 1997-2018

[2] C. A. Schneider, W. S. Rasband and K. W. Eliceiri, *Nature Methods*, 2012, **9**, 671-675.
